# Supplementary material for: Outcomes of Anticoagulation Initiation in Critically Ill Patients with New-Onset Atrial Fibrillation: A Multicenter Retrospective Cohort Study
Source: Research Square preprint supplement (doi:10.21203/rs.3.rs-7596772/v1), 2025-10-17
Supplement: Supplementary file 1 [file 24a97799a718546d0fa6debb.docx]

**Supplementary Appendix**

**Table e1: Descriptive data of thromboembolic events:**

| Serial number | Record Number | Group | Age (years) | Gender | APACHI score | stroke history | Type of thrombotic event | Time to thrombotic event post NOAF |
| --- | --- | --- | --- | --- | --- | --- | --- | --- |
| 1 | 2 | Non- AC | 74.1425218 | Male | 33 | No | Stroke | 5 days |
| 2 | 9 | Non- AC | 47.401384 | Male | 34 | No | DVT | 9 days |
| 3 | 30 | Non- AC | 47.8175459 | Female | 22 | No | Stroke | 7 days |
| 4 | 38 | Non- AC | 89.2284024 | Female | 13 | No | DVT | 10 days |
| 5 | 139 | AC | 58.0025599 | Female | 11 | No | PE | 9 days |
| 6 | 144 | Non- AC | 60.9786649 | Male | 30 | No | DVT | 18 days |
| 7 | 187 | AC | 76.7079537 | Male | 17 | No | Stroke | 2 days |

**AC:** Anticoagulation, **DVT:** Deep venous thrombosis, **PE:** Pulmonary embolism
